# Supplementary material for: Robust Whole Slide Image Analysis for Cervical Cancer Screening Using Deep Learning
Source: Research Square preprint supplement (doi:10.21203/rs.3.rs-377187/v1), 2021-04-08
Supplement: Supplementary file 1 [file 792f68f0f8113dbb5233508b.docx]

**Supplementary Figure 1**


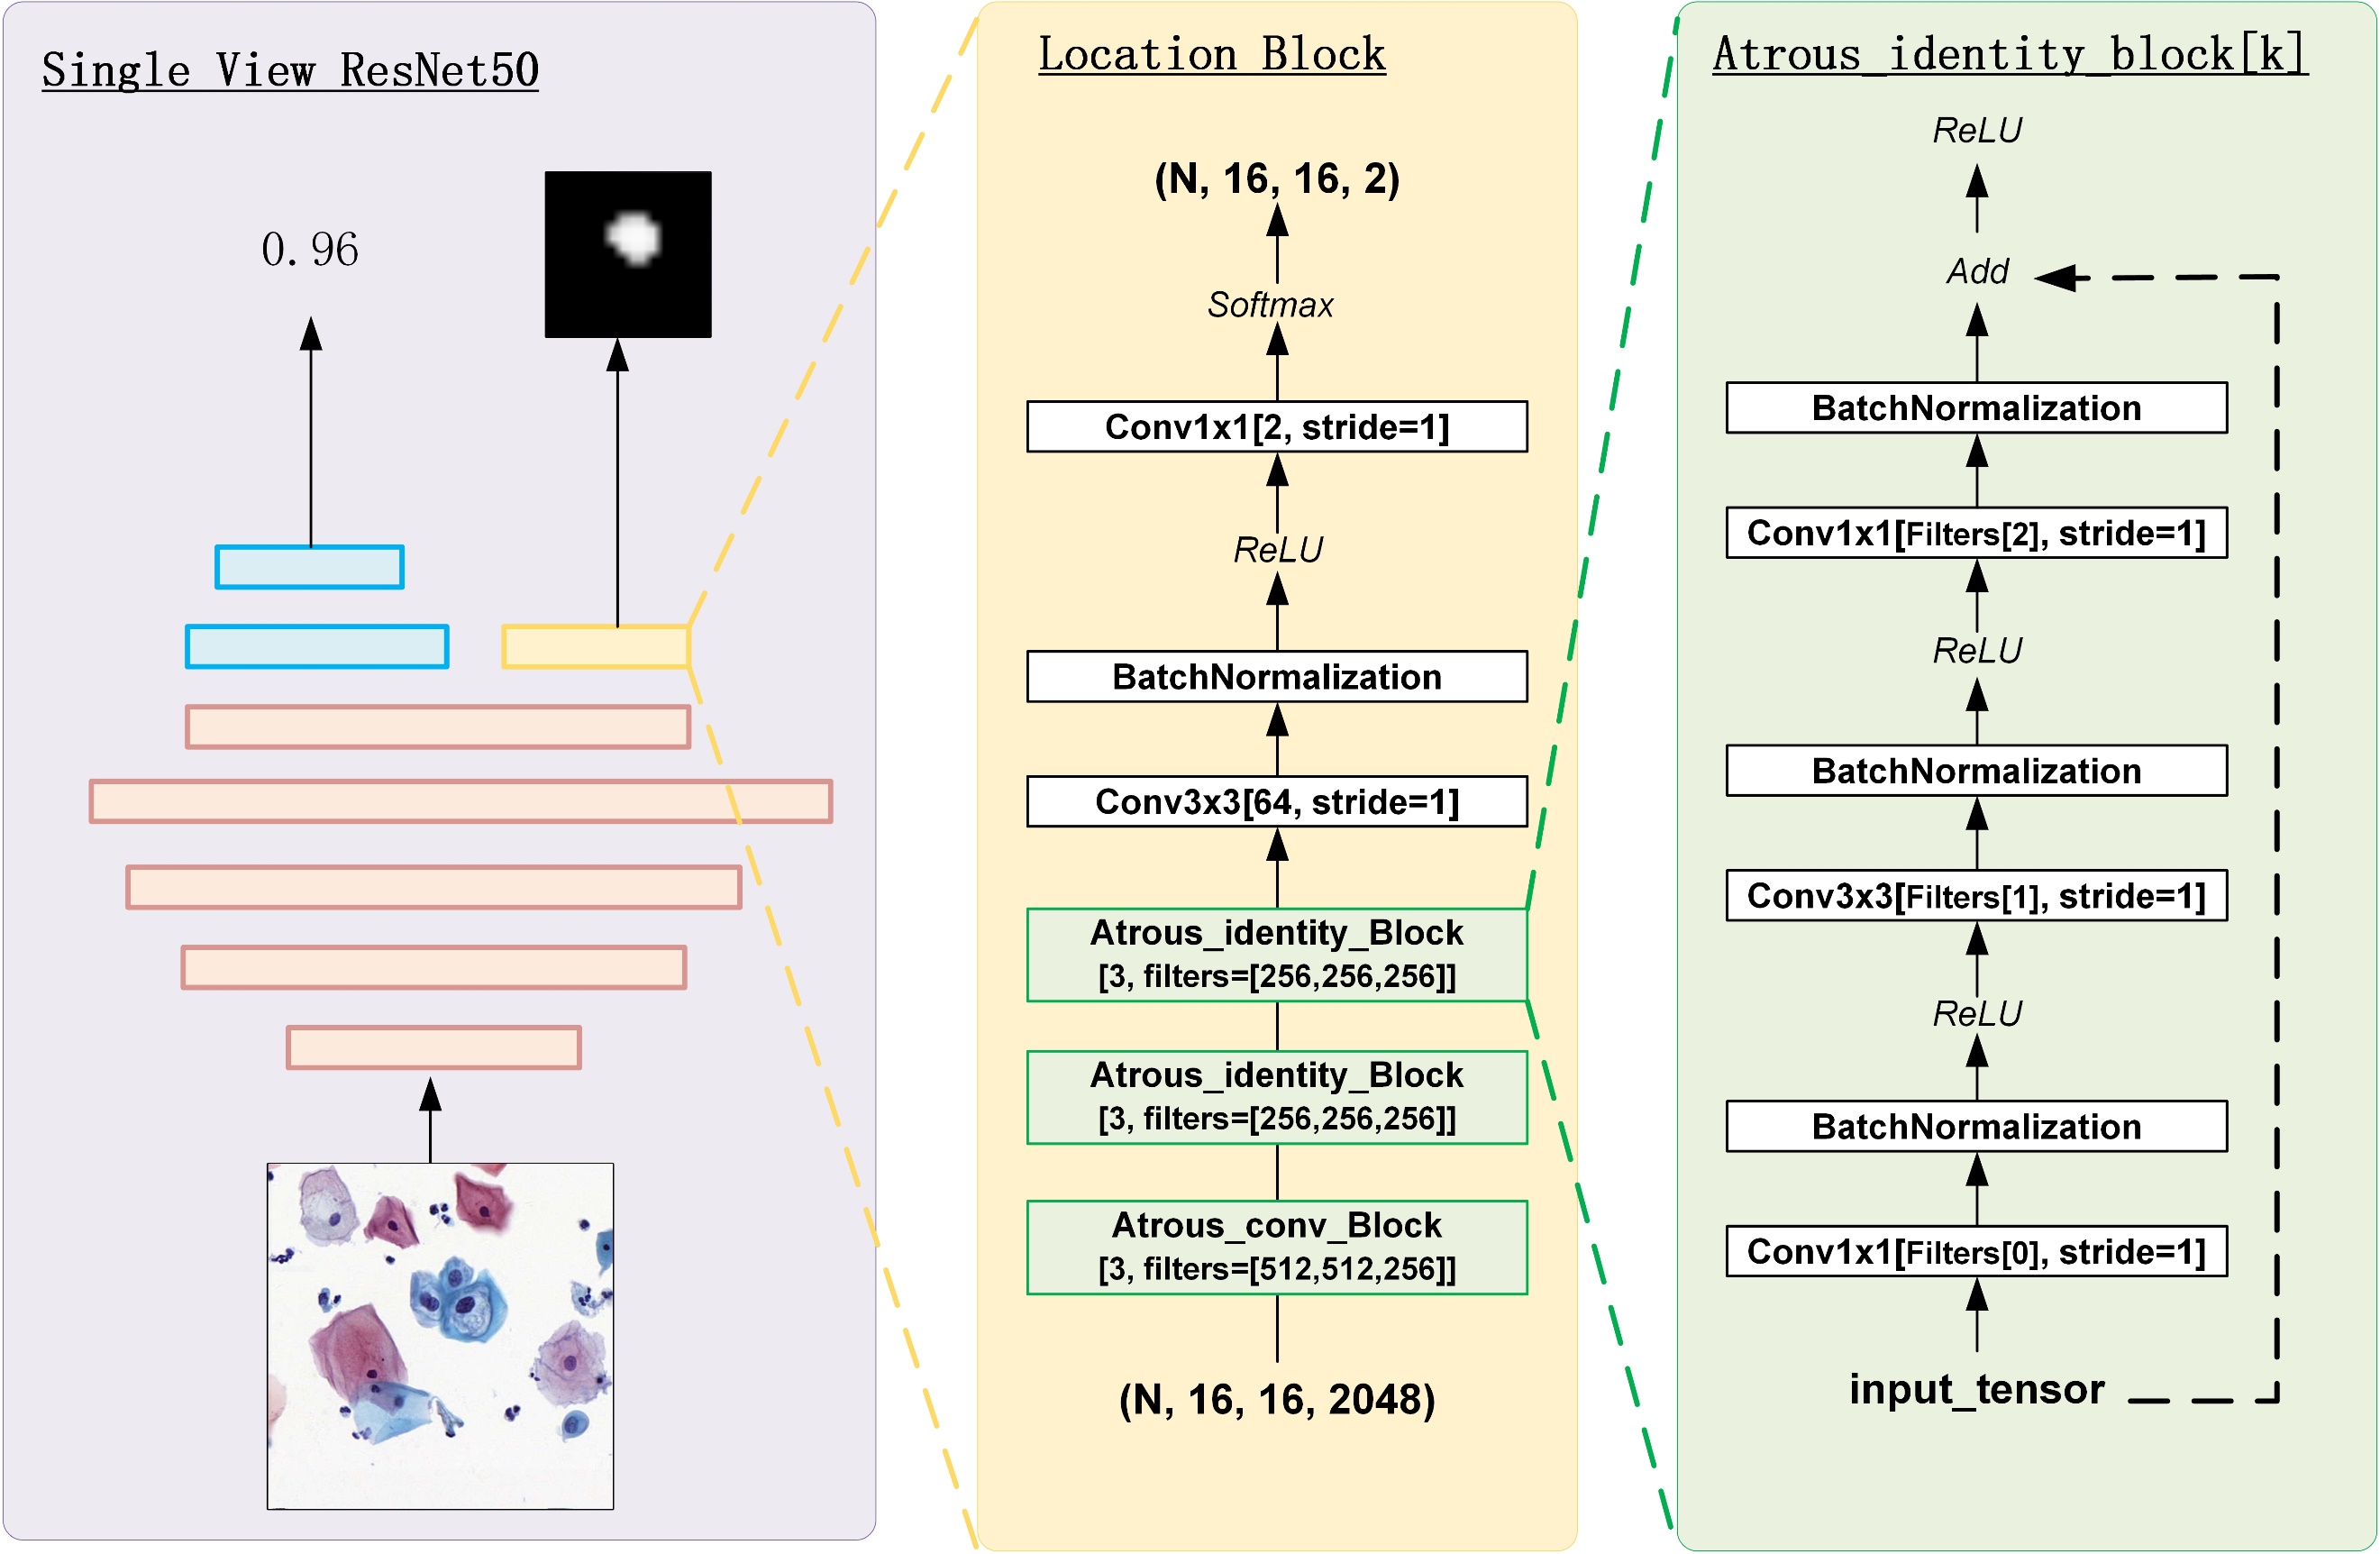


**Supplementary Figure 1 | The architecture of the LR model.** We modified the fully connected layer of the original ResNet50 and add a semantic segmentation branch for generating rough location mask. The semantic segmentation branch is constructed with residual blocks of dilated convolutions. The LR model accepts an image tile of 512 × 512 pixels (0.486 m/pixel) as input and outputs a lesion probability and a location heatmap.

**Supplementary Figure 2**


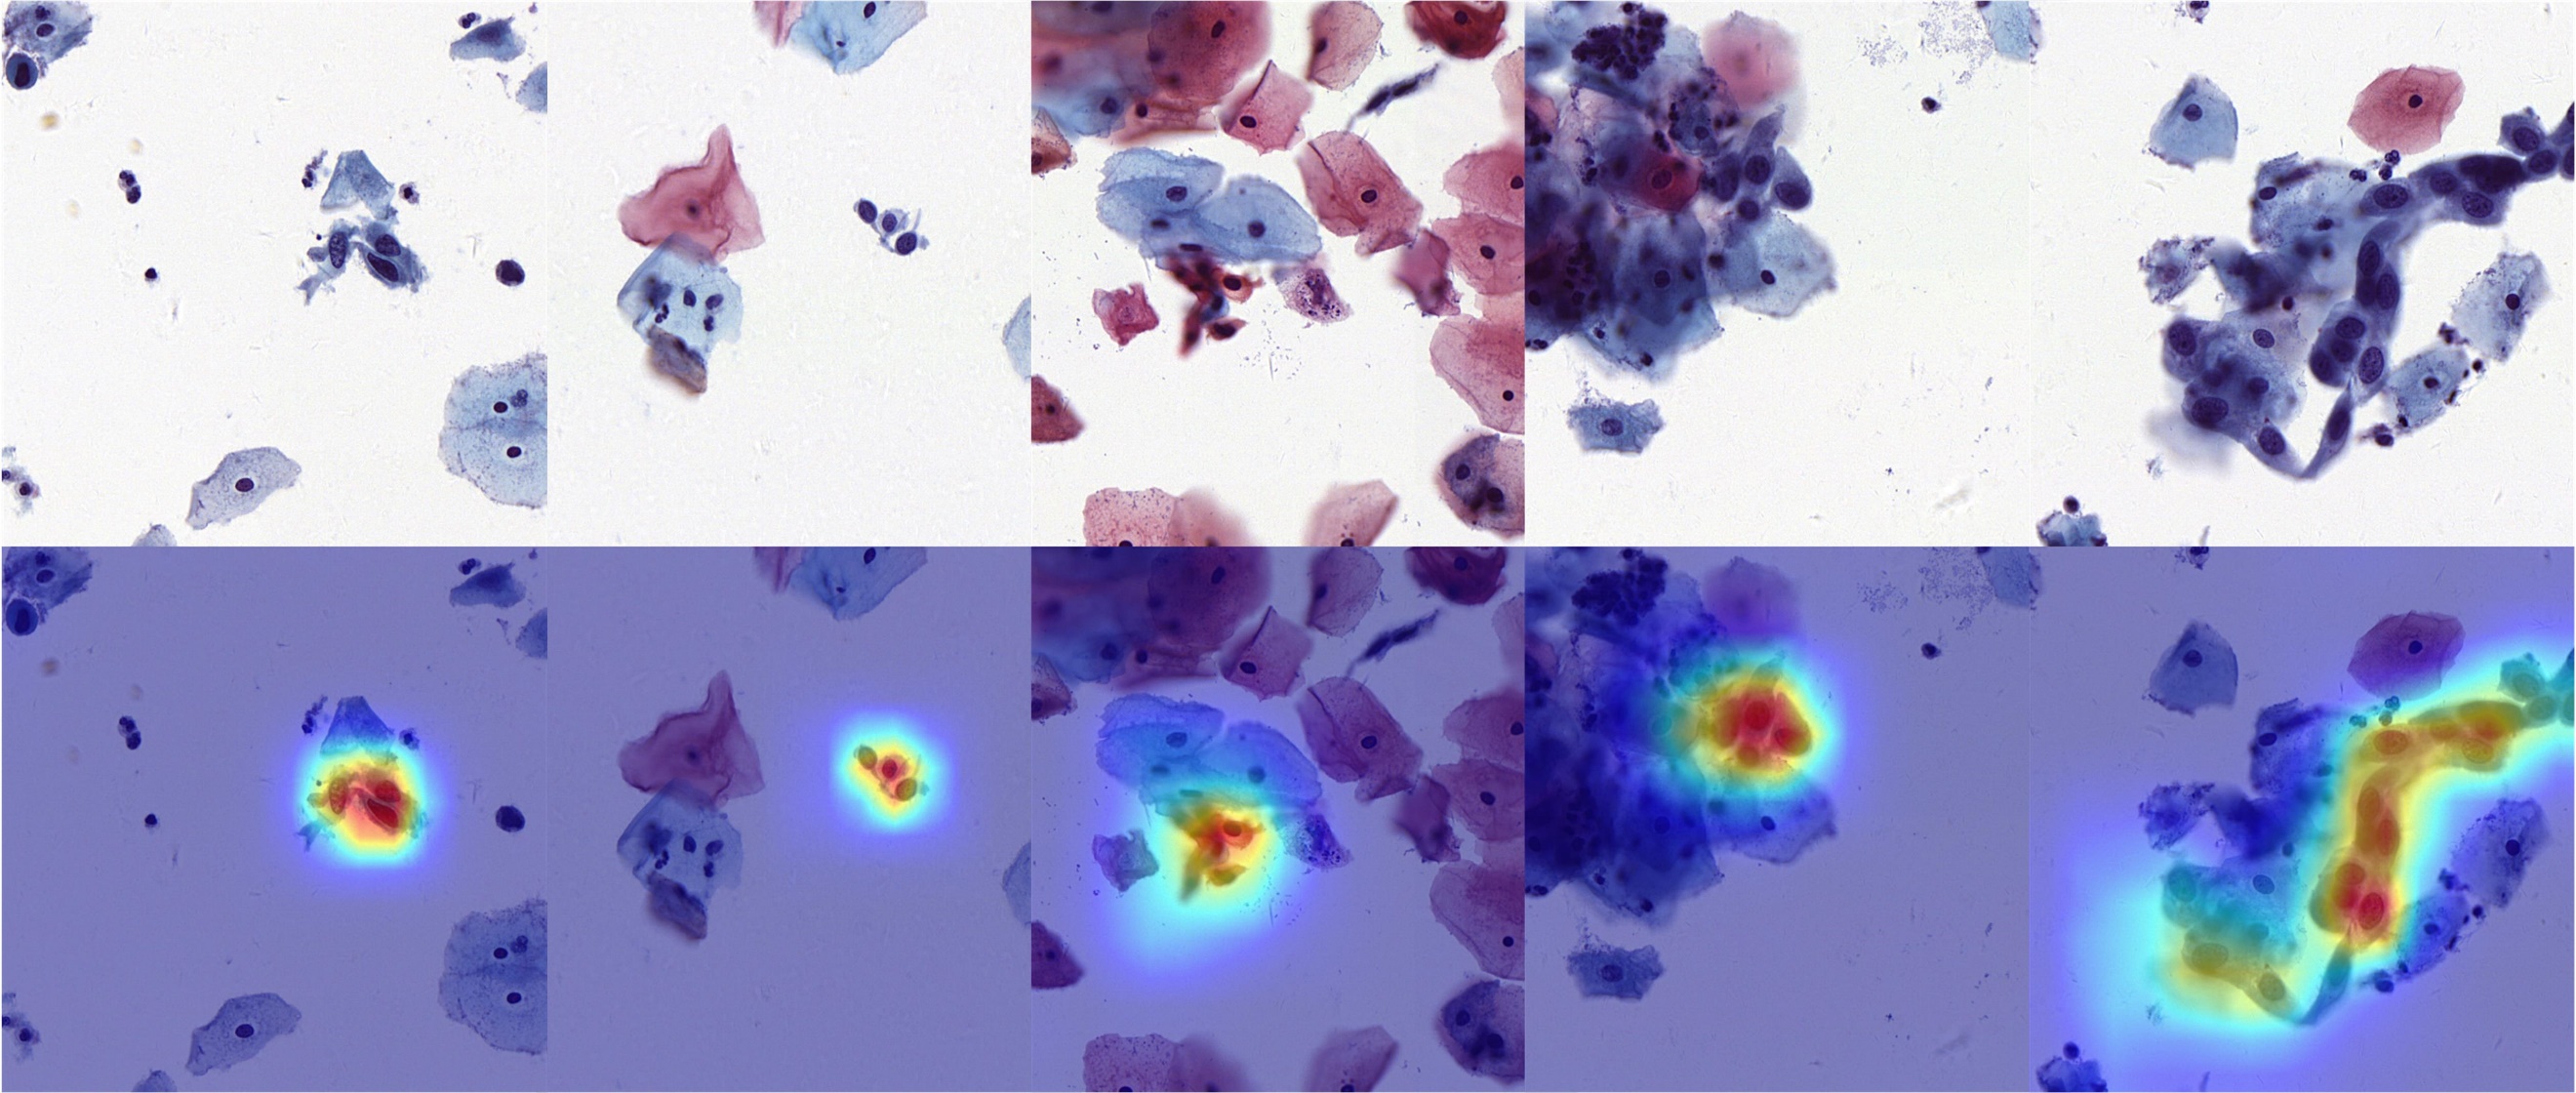


**Supplementary Figure 2 | Visualization of heatmaps generated by the LR model.** The above are cervical cell image tiles of 512 × 512 pixels (0.486 m/pixel). The below are the merged images with the cervical cell images and corresponding location heatmaps. Notably, the redder, the higher the lesion probability.
